# Supplementary material
Source: Springer Nature journal article supplement (https://www.springermedizin.de/resource/supplementary/12936_2012_2507_MOESM4_ESM.pdf/9543118)

Artesunate 2mg/kg

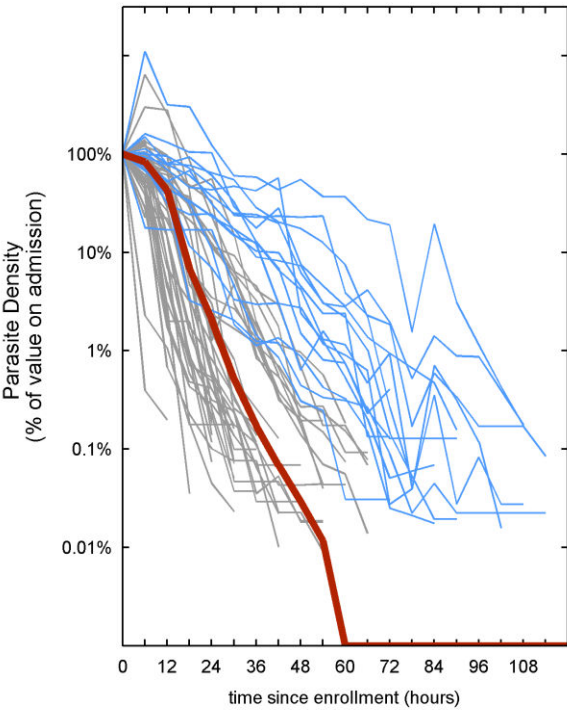

Artesunate 4mg/kg

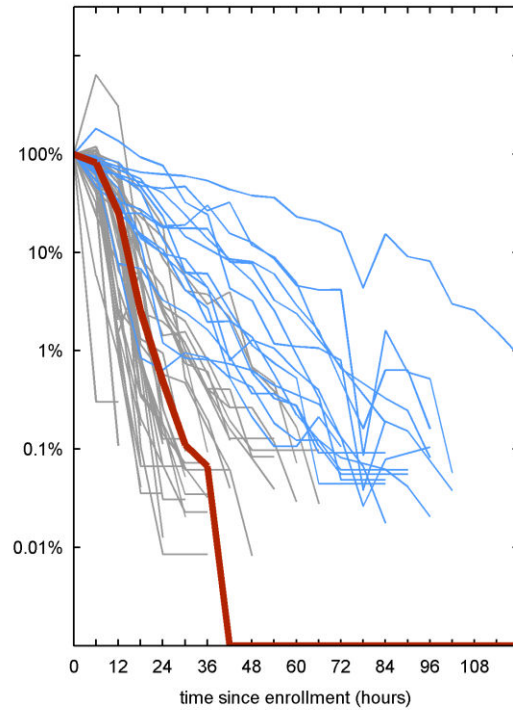

DHA-Piperaquine

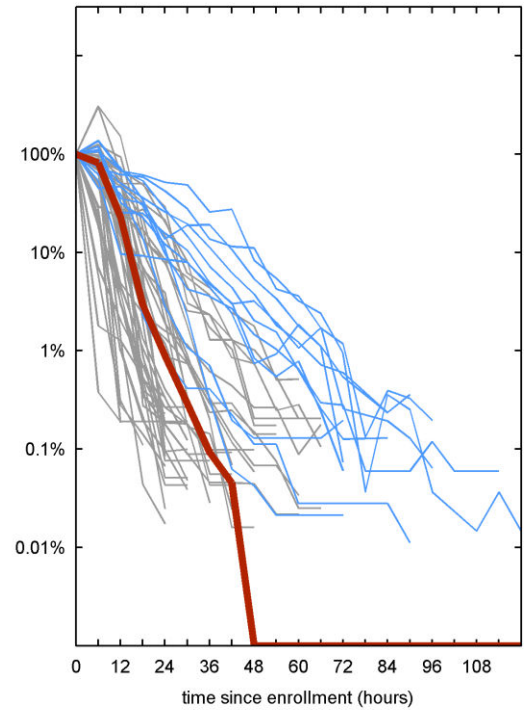

Supplement: MOESM4 [file 9543118]
